# Supplementary material for: Quantitative Epistasis Analysis and Pathway Inference from Genetic Interaction Data
Source: PLoS Comput Biol. 2011 May 12;7(5):e1002048. doi: 10.1371/journal.pcbi.1002048 (PMC3093353; doi:10.1371/journal.pcbi.1002048)
Supplement: Table S2 — Predicted values of the β-parameters in Eq. (1) given different assumptions. (DOC) [file pcbi.1002048.s002.doc]

**Table S2:** Isolating signal-specific gene deletion effects.

|  | | **(1)** | **(2)** | **(3)** |
| --- | --- | --- | --- | --- |
| **Pathway 1 & 2** |  |  |  | 0 |
|  |  |  | 0 |
|  |  |  | 0 |
|  |  |  |  |
|  |  |  |  |
|  |  |  |  |
| **Pathway 3 & 4** |  |  |  | 0 |
|  |  |  |  |
|  |  |  | 0 |
|  |  |  |  |
|  |  |  | 0 |
|  |  |  |  |
| **Pathway 5 & 6** |  |  |  |  |
|  |  |  |  |
|  |  |  |  |
|  |  |  | 0 |
|  |  |  | 0 |
|  |  |  | 0 |
| **Pathway 7 & 8** |  |  |  |  |
|  |  |  | 0 |
|  |  |  |  |
|  |  |  | 0 |
|  |  |  |  |
|  |  |  | 0 |

The table shows the predicted values of the **-parameters in Eq. (1) given different assumptions. The signal-specific effect of deleting the upstream gene is defined by *XY* = *X* +*Y* for pathways 1, 2, 5 and 6, and by *XY* = *X* - *Y* pathways 3, 4, 7 and 8. **Column (1):** No assumptions are made. **Column (2):** The magnitudes of signal-dependent gene influences (*XY*, *Y*) are much greater than the signal-independent influences (*X* + *I*; *Y* + *I*; and *I*). **Column (3):** The signal-independent influences are negligible. The basal effect of deleting a gene that has signal-specific function always is always lower magnitude than the signal-specific effect for (2) and (3). It is also true when the basal and signal-specific effects have the same sign, i.e., when sign(*XY*) = sign(*I* + *X*); sign(*Y*) = sign(*I* + *Y*); and sign(*Y*) = sign(*I*).
